# Supplementary material
Source: publisher site journal article supplement (https://www.spandidos-publications.com/5442/downloadSupplementary)

Figure S1. The correlation of sMICA with sULBP2 in the sera of patients with neuroblastoma. s, soluble.

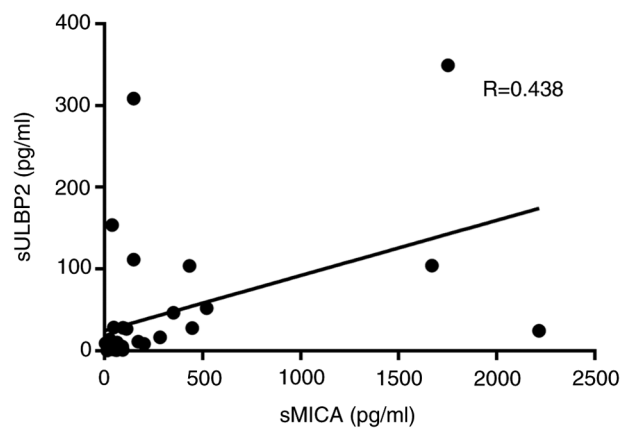

Supplement: Supplementary file 1 [file downloadSupplementary]
